# Supplementary material for: Prognostic Significance of the Tumor-Stromal Ratio in Invasive Breast Cancer and a Proposal of a New Ts-TNM Staging System
Source: Hindawi journal article supplement (doi:10.1155/2020/9050631), 2020-04-21
Supplement: f1 [file 9050631.f1.pdf]

**Supplementary Table 1** Analysis of characteristics regarding 5-DFS

| Characteristics           | Total (N=240) | No. of disease (%) | 5-DFS rate (%) | P value |
|---------------------------|---------------|--------------------|----------------|---------|
| <b>Age (years)</b>        |               |                    |                | 0.182   |
| ≤ 50                      | 149 (62.1)    | 55 (60.4)          | 63.1           |         |
| > 50                      | 91 (37.9)     | 36 (39.6)          | 60.4           |         |
| <b>Menopausal status</b>  |               |                    |                | <0.001  |
| Premenopausal             | 134 (55.8)    | 45 (49.5)          | 66.4           |         |
| Postmenopausal            | 106 (44.2)    | 46 (50.5)          | 56.6           |         |
| <b>Histological type</b>  |               |                    |                | <0.001  |
| Invasive ductal carcinoma | 191 (79.6)    | 78 (85.7)          | 59.2           |         |
| Others                    | 49 (20.4)     | 13 (14.3)          | 73.5           |         |
| <b>T stage (cm)</b>       |               |                    |                | <0.001  |
| T1 (T ≤ 2)                | 35 (15.0)     | 4 (4.4)            | 88.6           |         |
| T2 (2 < T ≤ 5)            | 162 (67.5)    | 60 (65.9)          | 63.0           |         |
| T3 (T > 5)                | 43 (17.5)     | 27 (28.7)          | 37.2           |         |
| <b>N status</b>           |               |                    |                | <0.001  |
| N negative                | 109 (45.4)    | 17 (18.7)          | 84.4           |         |
| N positive                | 131 (54.6)    | 74 (81.3)          | 43.5           |         |
| <b>Histological grade</b> |               |                    |                | <0.001  |
| I                         | 40 (16.7)     | 4 (4.4)            | 90.0           |         |
| II                        | 141 (58.8)    | 40 (43.9)          | 71.6           |         |
| III                       | 59 (24.6)     | 47 (51.7)          | 20.3           |         |
| <b>ER status</b>          |               |                    |                | <0.001  |
| Positive                  | 106 (44.2)    | 25 (27.5)          | 76.4           |         |
| Negative                  | 134 (55.8)    | 66 (72.5)          | 50.7           |         |
| <b>HER2 gene</b>          |               |                    |                | <0.001  |
| Amplification             | 51 (21.3)     | 29 (31.9)          | 43.1           |         |

|                   |            |           |      |
|-------------------|------------|-----------|------|
| Non-amplification | 189 (78.7) | 62 (68.1) | 67.2 |
|-------------------|------------|-----------|------|

---

T: tumor; N: node; 5-DFS: 5-year disease free survival; ER: estrogen receptor; HER2:  
human epidermal growth factor receptor-2
